# Supplementary material
Source: PubMed Central journal article supplement (PMC1369191)
Supplement: 6-7400530-s1.pdf [file 6-7400530-s1.pdf]

## Supplementary Methods

### Signaling pathway reporter

The *mtk luc* reporter was generated by fusing a 343bp long promoter containing several Rel binding sites (Senger et al., 2004) from the *Metchnikowin* gene fragment to the *firefly* luciferase gene. Primers were designed to contain SpeI and HindIII sites

forward: 5'-AGGATTACTAGTCAGAAAAACCAACAGGGCGCTAAA

reverse: 5'-CACATGAAGCTTTAGCTCGGTGGCGGGAATTGATTGA

The region was amplified by PCR from *Drosophila* genomic DNA and subsequently cloned into the pGL3-basic luciferase reporter vector (Promega, Madison, WI, USA).

### Genome-wide RNAi screen of the IMD pathway

All screening experiments were performed in 96-well tissue culture plates (Cellstar, Greiner, Frickenhausen, Germany). Screening plates were pre-loaded with an average of 1 $\mu$ g dsRNA per well in 10 $\mu$ l of 1mM Tris pH7 with a Biomek FX robot (Beckmann-Coulter, Fullerton, CA, USA). To transfect the reporter constructs, 5 million SL2 cells were seeded per 35mm dish (Cellstar, Greiner, Frickenhausen, Germany) and cultured for 24h. 2 $\mu$ g plasmid DNA (1 $\mu$ g *mtk luc* and 1 $\mu$ g pIZ (Invitrogen, Carlsbad, CA USA) *Renilla* luciferase expression plasmid) was co-transfected using Effectene (Qiagen, Hilden, Germany) according to the manufacturer's instructions. 16h after transfection, cells were resuspended in serum free medium. 50,000 cells in 50 $\mu$ l were subsequently seeded onto the dsRNA per well in 96-well tissue culture plates using a liquid dispensing unit (Multidrop, Thermo Labsystems, Egelsbach, Germany). After 45 minutes of starvation, 50 $\mu$ l of serum containing medium was added to each well. Cells were incubated in sealed assay

Gesellchen et al.

plates at 25°C. 4 days after RNAi treatment, cells were stimulated by adding heat-inactivated *E.coli* (DSM498) to a final concentration of 20µg/ml. 16h after induction, cells were lysed and the lysate was split to read firefly and *Renilla* luciferase activities independently in separate assay plates (white 96-well LIA plates, Greiner) using a Mithras LB940 plate reader (Berthold Technologies, Bad Wildbad, Germany). The screen was performed in duplicate.

### **Computational analysis**

To identify candidate genes that modified IMD signalling pathway activity, the raw luciferase results were normalized by median centering of each 96well plate separately for FL and RL channels. *z*-scores were calculated as the number of median adjusted standard deviations (mad; implemented in *R*) that a particular well differed from the median of the 96well plate. We filtered dsRNA treatments with a minimum *z*-scores > 2.4 for negative regulators or < -2.4 for positive regulators in both replicates, respectively. Selected candidates were retested in secondary assays.

### **Cell-based assay for Toll signaling**

5 million SL2 cells in a 35mm dish were transiently transfected using Cellfectin. Toll pathway was induced with a constitutive active Toll expression vector (0.1µg) which was obtained by subcloning an EcoRV-ApaI fragment from pMT-TollΔLRR (Sun et al., 2002) into the EcoRV and ApaI sites of pACV5His (Invitrogen, Carlsbad, CA, USA) downstream of the actin promoter. In addition, a *Drosomycin* firefly luciferase reporter (0.9µg) (Tauszig et al., 2000) and a plasmid constitutively expressing *Renilla* luciferase under the control of a ribosomal protein (RNA polymerase III 128kD subunit protein) promoter (1µg) (RP128-RL, Kerstin Bartscherer unpublished) were

Gesellchen et al.

co-transfected. 16h after transfection, cells were collected and resuspended in serum free medium. 20,000 cells in 20ml were seeded onto assay plates (384 well polystyrene plates from Greiner) preloaded with 0.3 $\mu$ g of dsRNA per well. After an incubation of 45 minutes, 30 $\mu$ l of complete medium was added; plates were sealed and incubated 5 days at 25°C to allow RNA depletion.

### **Cell viability assay**

CellTiter Glo (Promega) assay of cell viability was performed in SL2 cells following treatment with dsRNA against GFP, DIAP1 and IAP2 as triplicates in 96-well tissue culture plates (Falcon, BD Biosciences, Heidelberg, Germany). Cells were incubated for 5 days at 25°C to allow protein depletion. CellTiter Glo reaction was performed following manufacturers instructions.

### **Cell-based assay for JAK/STAT signaling**

S2R<sup>+</sup> cells were transfected using Effectene with 0.5 $\mu$ g of *6x3xDrafLuc* JAK/STAT signaling reporter, 0.5 $\mu$ g of *pAc5.1-UpdGFP* to induce the pathway (Mueller et al., 2005), 0.25 $\mu$ g of *RP128-RL Renilla* luciferase plasmid as a co-reporter and 0.75 $\mu$ g of *pAC5.1* plasmid (Invitrogen) to adjust the DNA amount to 2 $\mu$ g. RNAi and luciferase assays were performed in 96-well plates as described above.

### **Epistasis Analysis**

For epistasis experiments, SL2 cells grown in 6-well plates were transfected with 0.7 $\mu$ g pPac-mycIMD-HA (Georgel et al., 2001) or Rel $\Delta$ PEST (Stoven et al., 2003) expression vectors to stimulate pathway activity. To monitor pathway activity *mtk luc* (0.7 $\mu$ g) and pIZ-RL (0.7 $\mu$ g) were cotransfected. 24h after transfection, cells were

Gesellchen et al.

collected and treated with dsRNA against *GFP*, *PGRP-LC*, *IMD*, *Tak1*, *Dredd*, *Key*, *Rel* or *IAP2* in 96-well plates as described above. All epistatic combinations were performed in quadruplicate. Luciferase activity was measured after 96h.

### **RNA extraction and quantitative real-time RT-PCR**

2 million SL2 cells were seeded in 1.5ml serum free medium per well of a 6-well tissue culture plate onto 15µg dsRNA (*GFP*, *IMD*, *IAP2* and *Mkk4/hep*). After a 1h starvation step, 2ml serum-containing medium was added. Cells were then incubated for 84h to ensure protein depletion. To induce an immune response, cells were stimulated for 60 minutes by adding heat-inactivated *E. coli* (20 µg /ml) or peptidoglycan (50 µg /ml; a kind gift of Bruno Lemaitre) to the medium. qPCR data was processed as described in (Pfaffl, 2001).

### **Determination of cell number by Neubauer hemocytometer count**

Per well of a 24-well plate (Greiner), 0.5 million SL2 cells were seeded in 0.5ml serum free medium and 2µg of dsRNA (*GFP*, *DIAP1* or *IAP2*) was added. After 1h starvation, 0.5ml serum containing medium was added per well, plates were sealed and incubated at 25°C. On the days 2 to 5, cells were removed from the well bottom by carefully pipetting up and down. The samples were stained with Trypan Blue (Sigma, Munich, Germany), transferred to a Neubauer hemocytometer chamber (Brand) and live cells counted by light microscopy. For each dsRNA, two independent samples were counted each day.

**Supplementary Figure 1** Cell-based assay system employed to monitor IMD/Rel signaling.

(A) Schematic representation of reporter constructs. To monitor IMD pathway activity, a reporter gene consisting of the firefly luciferase gene under control of the promoter of the IMD/Rel target gene *metchnikowin* (*mtk*) was used. As a secondary assay, an *attacin* (*attA*) reporter was employed (middle panel). A constitutively expressed *IZ Renilla* luciferase reporter construct allows monitoring of cell growth and viability (bottom panel).

(B) Luciferase assay system. In SL2 cells, the firefly luciferase reporter is 22-fold induced after stimulation with heat-inactivated *E.coli* for 18h (FL, black bars). The constitutive expression of the *Renilla* luciferase reporter is independent of an immune stimulus (RL, white bars). Error bars represent standard deviations of 4 independent replicates. See also Supplementary Figure 1 for *mtk* reporter specificity.

(C) (D) and (E) Cell-based assay demonstrating the specificity of *mtk luc* reporter construct for IMD/Rel signaling in SL2 cells.

The *mtk luc* reporter is based on promotor sequences that have been previously shown to contain NF- $\kappa$ B binding sites specific for Relish, but not the related NF- $\kappa$ B factors Dorsal and Dif (Senger et al., 2004). Consistently, the reporter is not activated by a dominant active Toll<sup>ALRR</sup> (C, Toll<sup>ALRR</sup>), which activates the Toll pathway reporter Drs luciferase. We also did not observe any effect of knock-down of *Tube*, a Toll signaling component on the *mtk* reporter induction (D, *Tube*) although its knock-down has an effect on the Drs reporter induction by Toll<sup>ALRR</sup> (E, *Tube*). Although *Metchnikowin* activation requires both Toll and IMD pathways *in vivo* (Levashina et al., 1995), we

Gesellchen et al.

are confident that the mtk reporter does only monitor IMD activity, but not Toll signaling activity.

**Supplementary Figure 2** ATP-viability assay after *IAP2* depletion.

To test *IAP2* requirement in cell viability, we used a luciferase based CellTiter-Glo (Promega) assay to measure intracellular ATP levels after 5 days of RNAi against *GFP*, *DIAP1* and *IAP2*. Luciferase activity following dsRNA treatment against *GFP* was used for normalization. Depletion of *DIAP1* led to a significant reduction of intracellular ATP levels and indicative of a strongly reduced viability. In contrast, RNAi against *IAP2* again did not show any viability phenotype in this assay.

**Supplementary Figure 3** Epistasis analysis of *IAP2*

qPCR analysis of *IAP2* function in JNK signaling in SL2 cells. mRNA levels of the JNK target gene *puckered* (*puc*) increase after stimulation with heat-inactivated *E.coli* for 1h (*GFP*, +). Knock down of JNK transcription factors (*AP-1*), blocks induction of the IMD/JNK cascade (*AP-1*, +). Similar to *AP-1* RNAi, *IAP2* knock down suppresses induction of IMD/JNK signaling (*IAP2*, +). Error bars represent standard deviation of two replicates.

## References

- Georgel, P., Naitza, S., Kappler, C., Ferrandon, D., Zachary, D., Swimmer, C., Kopczynski, C., Duyk, G., Reichhart, J.M. and Hoffmann, J.A. (2001) *Drosophila* immune deficiency (IMD) is a death domain protein that activates antibacterial defense and can promote apoptosis. *Dev Cell*, **1**, 503-514.
- Levashina, E.A., Ohresser, S., Bulet, P., Reichhart, J.-M., Hétru, C. and Hoffmann, J.A. (1995) Metchnikowin, a novel immune-inducible proline-rich peptide from *Drosophila* with antibacterial and antifungal properties. *Eur. J. Biochem.*, **233**, 694-700.
- Muller, P., Kutenkeuler, D., Gesellchen, V., Zeidler, M.P. and Boutros, M. (2005) Identification of JAK/STAT signalling components by genome-wide RNA interference. *Nature*, **436**, 871-875.
- Pfaffl, M.W. (2001) A new mathematical model for relative quantification in real-time RT-PCR. *Nucleic Acids Res*, **29**, e45.
- Senger, K., Armstrong, G.W., Rowell, W.J., Kwan, J.M., Markstein, M. and Levine, M. (2004) Immunity regulatory DNAs share common organizational features in *Drosophila*. *Mol Cell*, **13**, 19-32.
- Stoven, S., Silverman, N., Junell, A., Hedengren-Olcott, M., Erturk, D., Engstrom, Y., Maniatis, T. and Hultmark, D. (2003) Caspase-mediated processing of the *Drosophila* NF-kappa B factor Relish. *Proc Natl Acad Sci U S A*, **100**, 5991-5996.
- Sun, H., Bristow, B.N., Qu, G. and Wasserman, S.A. (2002) A heterotrimeric death domain complex in Toll signaling. *Proc Natl Acad Sci U S A*, **99**, 12871-12876.
- Tauszig, S., Jouanguy, E., Hoffmann, J.A. and Imler, J.L. (2000) Toll-related receptors and the control of antimicrobial peptide expression in *Drosophila*. *Proc Natl Acad Sci U S A*, **97**, 10520-10525.

**Supplementary Table 1: Candidate modifiers of IMD/Rel signaling**

| gene     |         | dsRNA ID <sup>a</sup> | mtk-reporter (z-score) | attA-reporter <sup>b</sup> [%] | IMD <sup>b</sup> Epistasis | Rel <sup>b</sup> Epistasis | Gene Ontology                              | Interpro 8.0 evidence | GO Evidence            |
|----------|---------|-----------------------|------------------------|--------------------------------|----------------------------|----------------------------|--------------------------------------------|-----------------------|------------------------|
| PGRP-LC  | CG4432  | HFA10461              | -7.0                   | 22                             | n.d.                       | n.d.                       | defense response                           |                       | GO:0006952             |
| IMD      | CG5576  | HFA05928              | -7.5                   | 20                             | +                          | -                          | signal transduction; defense response      | IPR000719             | GO:0007165; GO:0006952 |
| Tak1     | CG18492 | HFA20561              | -5.2                   | 53                             | +                          | -                          | signal transduction; defense response      | IPR000719             | GO:0007165; GO:0006952 |
| Dredd    | CG7486  | HFA18461              | -5.0                   | 29                             | +                          | -                          | apoptosis, defense response                |                       | GO:0007165; GO:0006952 |
| Key      | CG16910 | HFA04285              | -6.2                   | 42                             | +                          | -                          | signal transduction                        |                       | GO:0008063; GO:0006952 |
| FADD     | CG12297 | HFA14122              | -2.7                   | n.d.                           | n.d.                       | n.d.                       | signal transduction; defense response      | IPR000488             | GO:0007165; GO:0006952 |
| IKK      | CG4201  | HFA16714              | -6.5                   | 17                             | +                          | -                          | signal transduction                        | IPR000719             | GO:0008063             |
| Rel      | CG11992 | HFA16819              | -6.9                   | 5                              | +                          | +                          | signal transduction                        | IPR000451             | GO:0007165             |
| IAP2     | CG8293  | HFA07444              | -2.5                   | 37                             | +                          | -                          | anti-apoptosis; protein ubiquitination     | IPR001370             | GO:0006916; GO:0016567 |
| Ush      | CG2762  | HFA00843              | -4.8                   | 62                             | +                          | +                          | signal transduction                        | IPR007087             | GO:0008293             |
| Hel25E   | CG7269  | HFA03342              | -6.7                   | 36                             | +                          | +                          | mRNA-nucleus export; nuclear mRNA splicing |                       | GO:0006406; GO:0000398 |
| CG6197   | CG6197  | HFA06967              | -4.3                   | 21                             | +                          | +                          | RNA processing and translation             | IPR003107             | GO:0006396             |
| AGO1     | CG6671  | HFA05912              | -5.3                   | 26                             | +                          | -                          | RNA processing and translation             | IPR003165             | GO:0016246             |
| CG8435   | CG8435  | HFA07179              | -2.8                   | 37                             | +                          | +                          | unknown                                    | IPR007590             |                        |
| CG6905   | CG6905  | HFA08577              | -4.2                   | 37                             | +                          | +                          | RNA processing and translation             | IPR001005             | GO:0000398             |
| CG2469   | CG2469  | HFA08562              | -4.2                   | 37                             | +                          | +                          | unknown                                    | IPR001440             |                        |
| CG5605   | CG5605  | HFA11779              | -5.4                   | 20                             | +                          | +                          | RNA processing and translation             | IPR004403             | GO:0006415             |
| Spt6     | CG12225 | HFA18836              | -5.0                   | 22                             | +                          | +                          | signal transduction                        | IPR006641             | GO:0007242             |
| CG17498  | CG17498 | HFA10274              | -3.8                   | 16                             | n.d.                       | n.d.                       | cell cycle                                 |                       | GO:0007049             |
| Gap1     | CG6721  | HFA11172              | -3.5                   | 36                             | +                          | -                          | signal transduction                        | IPR001936             | GO:0000165             |
| Tit      | CG1856  | HFA17091              | -3.0                   | 45                             | n.d.                       | n.d.                       | Transcription regulator                    | IPR007087             | GO:0000122             |
| Arf102F  | CG11027 | HFA17195              | -3.3                   | 36                             | +                          | -                          | signal transduction                        | IPR006689             | GO:0007166             |
| I(1)10Bb | CG1639  | HFA20346              | -4.0                   | 35                             | +                          | -                          | Transcription regulator                    | IPR001748             | GO:0030528             |
| Cactin   | CG1676  | HFA20576              | -2.5                   | 68                             | n.d.                       | n.d.                       | signal transduction                        |                       | GO:0007165             |

<sup>a</sup> Complete amplicon information and details on score specificity can be obtained at <http://rna1.dkfz.de>

<sup>b</sup> Percent reporter activity after E. coli treatment as compared to an unrelated control (GFP). (+) denotes a decrease with  $p < 0.05$



**Supplementary Table 2: dsRNA template and qPCR primer sequences**

| Gene                                                                                                                                                                                                                                                                                                           | Primer 1                 | Primer 2                 |             |
|----------------------------------------------------------------------------------------------------------------------------------------------------------------------------------------------------------------------------------------------------------------------------------------------------------------|--------------------------|--------------------------|-------------|
| <b>Gene-specific primers for RNAi probes</b>                                                                                                                                                                                                                                                                   |                          |                          |             |
| Tube                                                                                                                                                                                                                                                                                                           | GGGACAATGACATTTAC        | GGCACCAGAAGTTGGAG        |             |
| Pelle                                                                                                                                                                                                                                                                                                          | GGGGCGTCAGCAACTCA        | GCCGAGGCTGATGCTAA        |             |
| GFP                                                                                                                                                                                                                                                                                                            | ACCCTCGTGACCACCCTGACCTAC | GGACCATGTGATCGCGCTTCTCGT |             |
| DIAP1                                                                                                                                                                                                                                                                                                          | CCGGCATGTACTTCACACAC     | GAATCGGCACTGACTTAGCC     |             |
| Tak1                                                                                                                                                                                                                                                                                                           | CCGTGGAACGCTAAGTATCC     | AGGCACAGTTAGCCAGCAAT     |             |
| PGRP-LC                                                                                                                                                                                                                                                                                                        | GACCAAAGATCGGGGGAC       | GCTTATCACCGAACGTCAC      |             |
| IMD                                                                                                                                                                                                                                                                                                            | GAGAATGTCAAAGCTCAGGAACCT | GAGAAATGCTGACCGTTTTGCGCG |             |
| Key                                                                                                                                                                                                                                                                                                            | GCCTGCGTTCACAGTCGTA      | GCTTCAGGACATCGGATTGAA    |             |
| Dome                                                                                                                                                                                                                                                                                                           | GCGTCTGCGCAGTGATCC       | GTGGGCTCCGATGGATAGA      |             |
| Stat92E                                                                                                                                                                                                                                                                                                        | GCTTGCCCAAACACTACAGTTAC  | GCGACTGTGGGTGGATTGTT     |             |
| IAP2                                                                                                                                                                                                                                                                                                           | GGAGCACAAGCGCTTTTTTC     | GACAACCTCCCATCGATACC     |             |
| Fos                                                                                                                                                                                                                                                                                                            | GGCAACGCGAATACCTCAAAT    | GGCTTGAGATCCAAGGGTGAA    |             |
| Jun                                                                                                                                                                                                                                                                                                            | GGGTAAACACCCCGATTTGG     | GCTAGCCAGGTCGACGTTCTC    |             |
| Hep                                                                                                                                                                                                                                                                                                            | CGCAGTCGGTTATCCTTGAT     | GGATCGGGTATCAGCATAGC     |             |
| Mkk4                                                                                                                                                                                                                                                                                                           | CTGCTCGAAAACAGAGTCCC     | AAATTGGACAAGGTGATGGC     |             |
| Rel                                                                                                                                                                                                                                                                                                            | GTGGAACACATGGATCGCTAA    | GCCGACTTGCGGTTATTGATT    |             |
| Dredd                                                                                                                                                                                                                                                                                                          | TCGTACGCCTCCACATTGTA     | CCGCTTGCTCCTAGATGTT      |             |
| <b>qPCR primer sequences</b>                                                                                                                                                                                                                                                                                   |                          |                          |             |
|                                                                                                                                                                                                                                                                                                                |                          |                          | <b>UPL*</b> |
| IAP2                                                                                                                                                                                                                                                                                                           | CACGCTTATGCAAGGTATGC     | GGGACAATTGGCTACACTGG     | 153         |
| Metchnikowin                                                                                                                                                                                                                                                                                                   | CCACCGAGCTAAGATGCAA      | TCTGCCAGCACTGATGTAGC     | 125         |
| IMD                                                                                                                                                                                                                                                                                                            | CCTTTCGAGAAGGCACAGTT     | TGCCTTTGTGTTTCTTTGCTC    | 77          |
| Rp49                                                                                                                                                                                                                                                                                                           | CGGATCGATATGCTAAGCTGT    | GCGCTTGTTCGATCCGTA       | 105         |
| Puckered                                                                                                                                                                                                                                                                                                       | GCCACATCAGAACATCAAGC     | CCGTTTTCCGTGCATCTT       | 79          |
| Mmp-1                                                                                                                                                                                                                                                                                                          | CCGATTTGCTGTTGACTCG      | GAGGGCGTGTTCTTGCA        | 131         |
| Cecropin A2                                                                                                                                                                                                                                                                                                    | GGACAATCGGAAGCTGGTT      | TGTGCTGACCAACACGTT       | 137         |
| <sup>a</sup> Probe Numbers according to updated Roche UniversalProbeLibrary Numbers for qPCR.<br>(Steckel and Boutros, Biochemica, 2005 ; Mouritzen et al.; Nature Methods, 2005; Mauritz et al.; Biochemica, 2005)<br><a href="http://www.universalprobelibrary.com">http://www.universalprobelibrary.com</a> |                          |                          |             |

**A**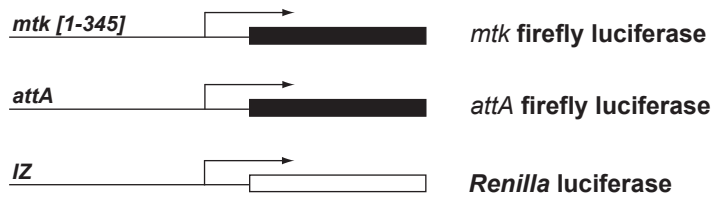**B**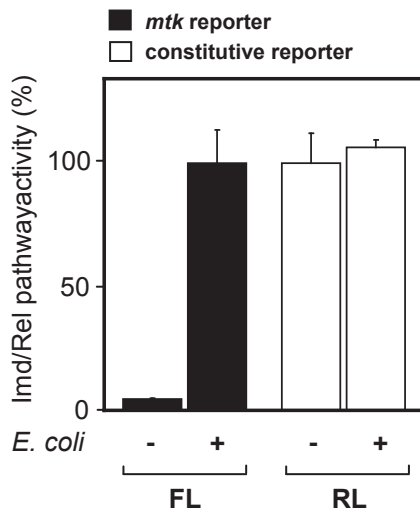**C**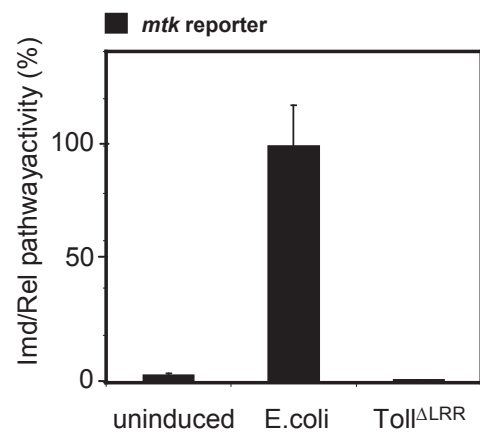**D**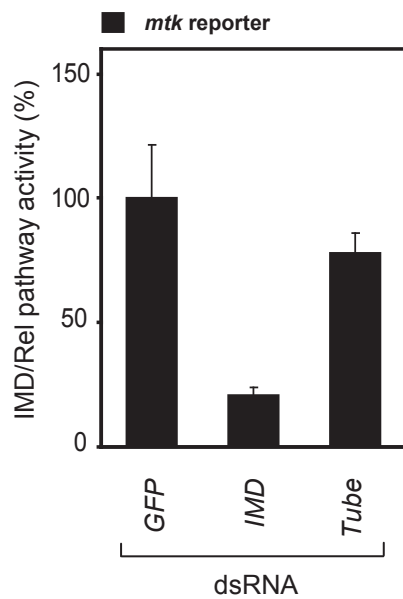**E**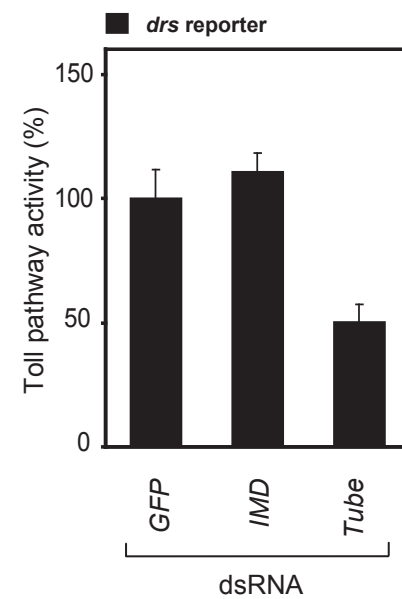

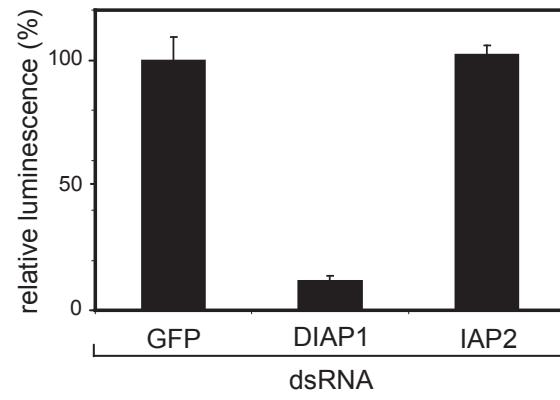

Supplementary Figure 2  
Gesellchen et al.

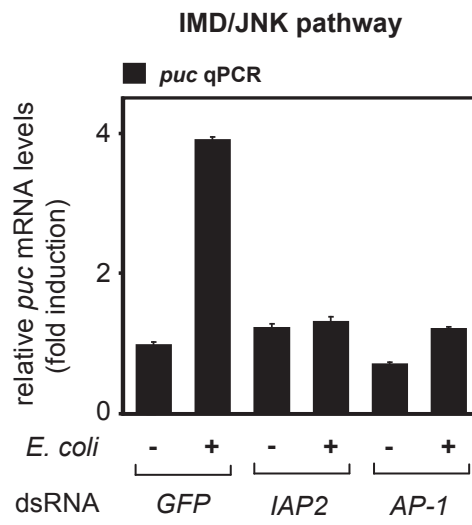

**Supplementary Figure 3**  
**Gesellchen et al.**
